# Supplementary material for: The NIH public access policy did not harm biomedical journals
Source: PubMed Central journal article supplement (PMC6808382; doi:10.1371/journal.pbio.3000352), 2019-10-23
Supplement: pbio.3000352.s009.pdf [file pbio.3000352.s009.pdf]

| year | total | birth | death |     | totallag | birthrate  | deathrate  | birthnet |
|------|-------|-------|-------|-----|----------|------------|------------|----------|
| 1    | 1980  | 2022  | 97    | 1   | 1926     | 50.3634476 | 0.5192108  | 96       |
| 2    | 1981  | 2125  | 104   | 1   | 2022     | 51.4342235 | 0.49455984 | 103      |
| 3    | 1982  | 2200  | 76    | 1   | 2125     | 35.7647059 | 0.47058824 | 75       |
| 4    | 1983  | 2291  | 92    | 1   | 2200     | 41.8181818 | 0.45454545 | 91       |
| 5    | 1984  | 2372  | 84    | 3   | 2291     | 36.6652117 | 1.30947185 | 81       |
| 6    | 1985  | 2448  | 76    | 0   | 2372     | 32.0404722 | 0          | 76       |
| 7    | 1986  | 2552  | 107   | 3   | 2448     | 43.7091503 | 1.2254902  | 104      |
| 8    | 1987  | 2649  | 100   | 3   | 2552     | 39.184953  | 1.17554859 | 97       |
| 9    | 1988  | 2761  | 116   | 4   | 2649     | 43.7901095 | 1.51000378 | 112      |
| 10   | 1989  | 2854  | 102   | 9   | 2761     | 36.9431365 | 3.25968852 | 93       |
| 11   | 1990  | 2958  | 113   | 9   | 2854     | 39.5935529 | 3.15346882 | 104      |
| 12   | 1991  | 3068  | 115   | 5   | 2958     | 38.87762   | 1.6903313  | 110      |
| 13   | 1992  | 3164  | 101   | 5   | 3068     | 32.9204694 | 1.62972621 | 96       |
| 14   | 1993  | 3257  | 97    | 4   | 3164     | 30.6573957 | 1.2642225  | 93       |
| 15   | 1994  | 3362  | 111   | 6   | 3257     | 34.0804421 | 1.84218606 | 105      |
| 16   | 1995  | 3477  | 121   | 6   | 3362     | 35.9904819 | 1.78465199 | 115      |
| 17   | 1996  | 3581  | 107   | 3   | 3477     | 30.7736555 | 0.86281277 | 104      |
| 18   | 1997  | 3685  | 110   | 6   | 3581     | 30.7176766 | 1.67550963 | 104      |
| 19   | 1998  | 3776  | 95    | 4   | 3685     | 25.78019   | 1.08548168 | 91       |
| 20   | 1999  | 3866  | 106   | 16  | 3776     | 28.0720339 | 4.23728814 | 90       |
| 21   | 2000  | 3959  | 110   | 17  | 3866     | 28.4531816 | 4.39730988 | 93       |
| 22   | 2001  | 4032  | 97    | 24  | 3959     | 24.5011367 | 6.0621369  | 73       |
| 23   | 2002  | 4124  | 112   | 20  | 4032     | 27.7777778 | 4.96031746 | 92       |
| 24   | 2003  | 4195  | 100   | 29  | 4124     | 24.2483026 | 7.03200776 | 71       |
| 25   | 2004  | 4268  | 105   | 32  | 4195     | 25.0297974 | 7.62812872 | 73       |
| 26   | 2005  | 4372  | 127   | 23  | 4268     | 29.7563261 | 5.38894096 | 104      |
| 27   | 2006  | 4486  | 130   | 16  | 4372     | 29.7346752 | 3.65965233 | 114      |
| 28   | 2007  | 4629  | 170   | 27  | 4486     | 37.8956754 | 6.01872492 | 143      |
| 29   | 2008  | 4753  | 178   | 54  | 4629     | 38.4532296 | 11.6655865 | 124      |
| 30   | 2009  | 4947  | 233   | 39  | 4753     | 49.0216705 | 8.20534399 | 194      |
| 31   | 2010  | 5155  | 249   | 41  | 4947     | 50.3335355 | 8.28785122 | 208      |
| 32   | 2011  | 5553  | 429   | 31  | 5155     | 83.2201746 | 6.01357905 | 398      |
| 33   | 2012  | 5948  | 432   | 37  | 5553     | 77.7957861 | 6.66306501 | 395      |
| 34   | 2013  | 6452  | 547   | 43  | 5948     | 91.9636853 | 7.22932078 | 504      |
| 35   | 2014  | 6596  | 280   | 136 | 6452     | 43.3973962 | 21.0787353 | 144      |
| 36   | 2015  | 6608  | 69    | 57  | 6596     | 10.4608854 | 8.64160097 | 12       |
| 37   | 2016  | 6594  | 70    | 84  | 6608     | 10.5932203 | 12.7118644 | -14      |
| 38   | 2017  | 6665  | 91    | 20  | 6594     | 13.8004246 | 3.03306036 | 71       |
| 39   | 2018  | 6700  | 79    | 44  | 6665     | 11.8529632 | 6.60165041 | 35       |
| 40   | 2019  | 6716  | 17    | 1   | 6700     | 2.53731343 | 0.14925373 | 16       |
| 41   | 2020  | 6716  | 0     | 0   | 6716     | 0          | 0          | 0        |
