# Supplementary material for: The NIH public access policy did not harm biomedical journals
Source: PLoS Biol. 2019 Oct 23;17(10):e3000352. doi: 10.1371/journal.pbio.3000352 (PMC6808382; doi:10.1371/journal.pbio.3000352)
Supplement: S1 Data — (PDF) [file pbio.3000352.s005.pdf]

Supplementary Table 1. Birth rates for journals, expressed as births per 1000 journals

[illegible]
