# Supplementary material for: The NIH public access policy did not harm biomedical journals
Source: PLoS Biol. 2019 Oct 23;17(10):e3000352. doi: 10.1371/journal.pbio.3000352 (PMC6808382; doi:10.1371/journal.pbio.3000352)
Supplement: S2 Data — (PDF) [file pbio.3000352.s006.pdf]

Supplementary Table 2. Death rates for journals, expressed as deaths per 1000 journals

[illegible]
