# Supplementary material for: The NIH public access policy did not harm biomedical journals
Source: PLoS Biol. 2019 Oct 23;17(10):e3000352. doi: 10.1371/journal.pbio.3000352 (PMC6808382; doi:10.1371/journal.pbio.3000352)
Supplement: S4 Data — OA, open access. (PDF) [file pbio.3000352.s008.pdf]

Supplementary Table 4. Death rates for journals, expressed as deaths per 1000 journals, excluding open access

[illegible]
